# Supplementary material for: Ultra-Stable Potassium Ion Storage of Nitrogen-Doped Carbon Nanofiber Derived from Bacterial Cellulose
Source: MDPI journal article supplement (doi:10.3390/nano11051130), 2021-04-27
Supplement: s1 [file s1]

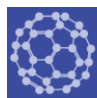

Supplementary material

# Ultra-Stable Potassium Ion Storage of Nitrogen-Doped Carbon Nanofiber Derived from Bacterial Cellulose

Liang Ma <sup>1,2,†</sup>, Jinliang Li <sup>2,†</sup>, Zhibin Li <sup>2</sup>, Yingying Ji <sup>2</sup>, Wenjie Mai <sup>2</sup> and Hao Wang <sup>1,\*</sup>

<sup>1</sup> Guangdong Provincial Key Laboratory of Micro/Nano Optomechatronics Engineering, College of Mechatronics and Control Engineering, Shenzhen University, Shenzhen 518060, China; maliang2415@jnu.edu.cn (L. M.)

<sup>2</sup> Siyuan Laboratory, Guangdong Provincial Engineering Technology Research Center of Vacuum Coating Technologies and New Materials, Department of Physics, Jinan University, Guangzhou, Guangdong 510632, China; lijnliang@email.jnu.edu.cn (J.L.); pibetaguita@gmail.com (Z.L.); jiyinying07@163.com (Y.J.); wenjiemai@email.jnu.edu.cn (W.M.);

\* Correspondence: whao@szu.edu.cn

† These authors contributed equally.

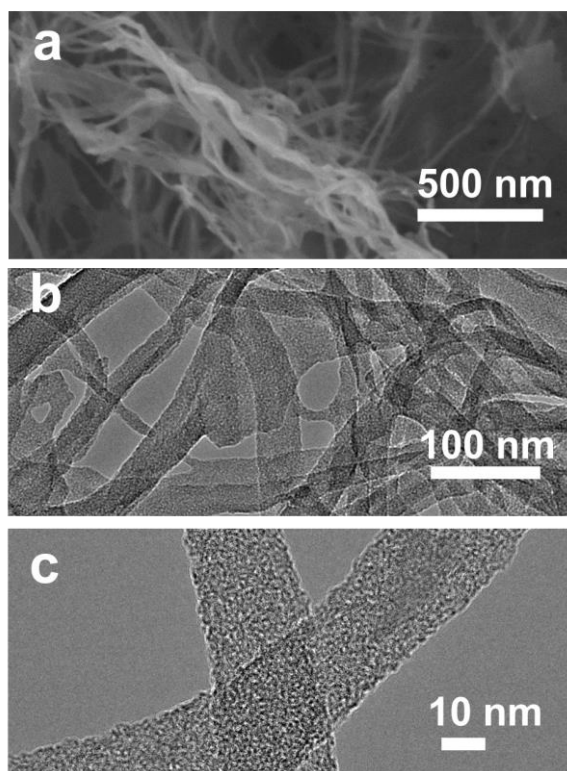

**Figure S1.** (a) SEM, (b) TEM and (c) high-resolution TEM image of CNF.

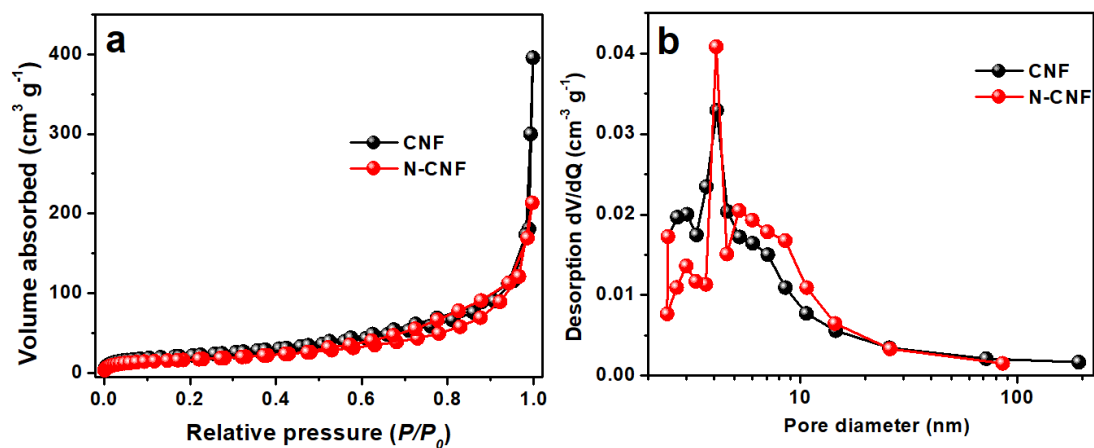

Figure S2. (a) nitrogen adsorption-desorption isotherms and (b) pore diameter distribution of CNF and N-CNF.

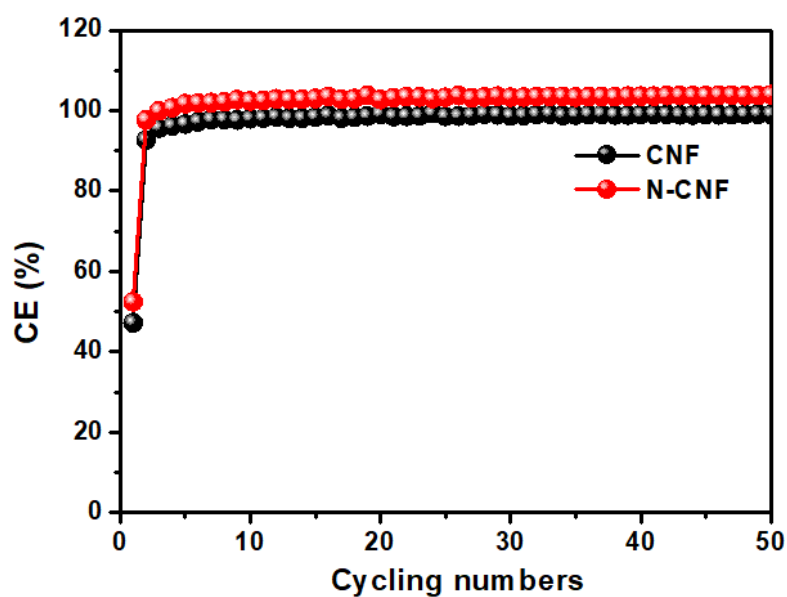

Figure S3. CEs of CNF and N-CNF.

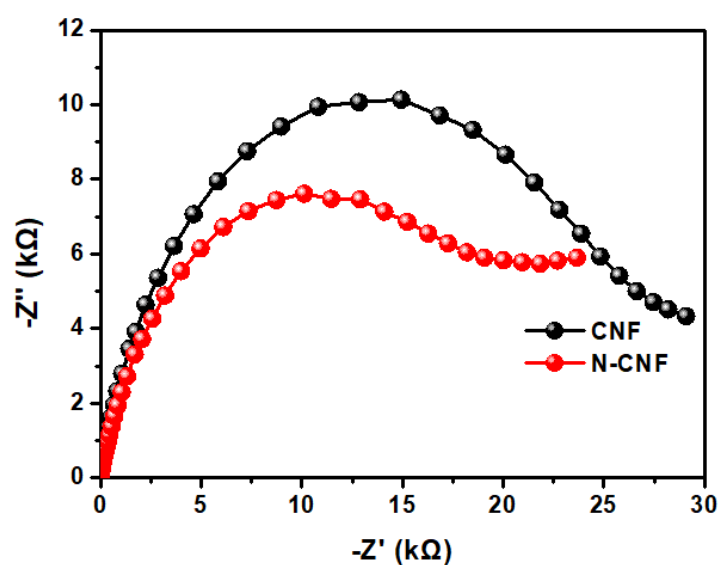

Figure S4. EIS of CNF and N-CNF after 50 cycles.

**Table S1.** The obtained parameters based on DFT calculation.

| <b>System</b> | <b><math>E_2</math> (eV)</b> | <b><math>E_1</math> (eV)</b> | <b><math>\mu K</math> (eV)</b> | <b><math>\Delta E_a</math> (eV)</b> |
|---------------|------------------------------|------------------------------|--------------------------------|-------------------------------------|
| C-C model     | -318.886                     | -316.785                     | -0.304                         | -1.80                               |
| C-N model     | -320.046                     | -317.604                     | -0.304                         | -2.14                               |
